# Supplementary material for: Pulsed Electric Field (PEF) Processing of Chilled and Frozen-Thawed Lamb Meat Cuts: Relationships between Sensory Characteristics and Chemical Composition of Meat
Source: MDPI journal article supplement (doi:10.3390/foods10051148), 2021-05-20
Supplement: s1 [file s1]

**Supplementary Table S1:** Description of sensory attributes used in the TDS trial

| Attribute                     | Taste definition in lamb                                                         | Reference                                                                                                                 |
|-------------------------------|----------------------------------------------------------------------------------|---------------------------------------------------------------------------------------------------------------------------|
| Initial tenderness            | Minimum force necessary (first bite) to bite the meat sample with incisors teeth | 3,different cuts of lamb (tenderloin,shoulder, leg) sous vide cooked and then grilled to an internal temperature of 70 °C |
| Meaty                         | Flavours and aromatics associated with boiled lean lamb meat                     | Lamb boiled at 100 °C for 10 min.                                                                                         |
| Browned                       | Flavours associated with meat that is cooked and charred on the outside.         | Lamb cooked at 70 °C, and allowed to brown on each side for 10 min.                                                       |
| Juicy                         | Amount of water retained in cooked meat that contribute to succulence.           | Different cuts of cooked lamb with varying levels of juiciness.                                                           |
| Livery                        | Taste associated with animal organs.                                             | Lamb liver cooked at 70 °C for 10 min.                                                                                    |
| Oxidized/ warmed over flavour | Flavour of reheated meat                                                         | Cooked lamb that was refrigerated for at least 24 h before reheating.                                                     |

**Supplementary Table S2.** The volatile composition of chilled lamb with and without PEF treatments (mg/100 g dry meat) during 0 or 7 days of storage

| No        | Volatiles       | Storage | Control               |                        |                        |                        |                        |                       |                        | PEF                    |                        |                         |                        |                        |                        |                        |
|-----------|-----------------|---------|-----------------------|------------------------|------------------------|------------------------|------------------------|-----------------------|------------------------|------------------------|------------------------|-------------------------|------------------------|------------------------|------------------------|------------------------|
|           |                 |         | Knuckle               | Loin                   | Rump                   | Rib                    | Shank                  | Shoulder              | Topside                | Knuckle                | Loin                   | Rump                    | Rib                    | Shank                  | Shoulder               | Topside                |
| Alcohols  |                 |         |                       |                        |                        |                        |                        |                       |                        |                        |                        |                         |                        |                        |                        |                        |
| 1         | 1-Hexanol       | 0       | 0.68 <sup>1a</sup> A  | 0.6 <sup>12a</sup> B   | 0.636 <sup>ay</sup> AB | 0.643 <sup>b</sup> AB  | 0.438 <sup>b</sup> C   | 0.427 <sup>ay</sup> C | 0.599 <sup>y</sup> B   | 0.526 <sup>b</sup> C   | 0.477 <sup>b</sup> D   | 0.495 <sup>b</sup> CD   | 0.684 <sup>ax</sup> A  | 0.645 <sup>ay</sup> B  | 0.407 <sup>ay</sup> E  | 0.627 <sup>B</sup>     |
|           |                 | 7       | 0.805 <sup>A</sup>    | 0.675 <sup>b</sup> B   | 0.828 <sup>ax</sup> A  | 0.675 <sup>a</sup> B   | 0.7 <sup>13</sup> B    | 0.495 <sup>b</sup> C  | 0.869 <sup>ax</sup> A  | 0.73 <sup>b</sup> B    | 0.82 <sup>1ax</sup> A  | 0.658 <sup>b</sup> C    | 0.489 <sup>b</sup> D   | 0.702 <sup>x</sup> BC  | 0.694 <sup>ax</sup> BC | 0.662 <sup>b</sup> C   |
| Ketones   |                 |         |                       |                        |                        |                        |                        |                       |                        |                        |                        |                         |                        |                        |                        |                        |
| 2         | 2,3-Octanedione | 0       | 0.95 <sup>1ay</sup> A | 0.626 <sup>ay</sup> CD | 0.629 <sup>ay</sup> CD | 0.79 <sup>ay</sup> B   | 0.667 <sup>ay</sup> C  | 0.527 <sup>ay</sup> E | 0.553 <sup>ay</sup> DE | 0.349 <sup>b</sup> B   | 0.238 <sup>b</sup> D   | 0.476 <sup>b</sup> A    | 0.47 <sup>b</sup> A    | 0.483 <sup>b</sup> A   | 0.349 <sup>b</sup> B   | 0.284 <sup>b</sup> C   |
|           |                 | 7       | 1.17 <sup>1ax</sup> B | 1.388 <sup>ax</sup> A  | 1.16 <sup>1ax</sup> B  | 0.935 <sup>ax</sup> C  | 0.783 <sup>ax</sup> D  | 1.05 <sup>ax</sup> B  | 1.043 <sup>ax</sup> C  | 0.859 <sup>b</sup> BC  | 0.768 <sup>b</sup> C   | 0.923 <sup>b</sup> AB   | 0.59 <sup>b</sup> D    | 0.573 <sup>b</sup> D   | 0.6 <sup>13</sup> bD   | 1.002 <sup>x</sup> A   |
| 3         | 2-Heptanone     | 0       | 0.372 <sup>b</sup> C  | 0.437 <sup>B</sup> C   | 0.47 <sup>b</sup> B    | 0.956 <sup>ax</sup> A  | 0.279 <sup>b</sup> D   | 0.374 <sup>b</sup> C  | 0.292 <sup>b</sup> D   | 0.557 <sup>ay</sup> C  | 0.468 <sup>b</sup> D   | 0.585 <sup>ay</sup> C   | 0.856 <sup>ax</sup> B  | 0.827 <sup>ax</sup> B  | 1.07 <sup>1ay</sup> A  | 0.456 <sup>ax</sup> D  |
|           |                 | 7       | 0.755 <sup>ax</sup> A | 0.475 <sup>b</sup> C   | 0.659 <sup>b</sup> B   | 0.345 <sup>b</sup> E   | 0.508 <sup>y</sup> C   | 0.624 <sup>b</sup> B  | 0.43 <sup>b</sup> D    | 0.665 <sup>ax</sup> D  | 0.753 <sup>ax</sup> C  | 1.099 <sup>ax</sup> B   | 0.5 <sup>13</sup> ayE  | 0.527 <sup>y</sup> E   | 1.17 <sup>13ax</sup> A | 0.782 <sup>ax</sup> C  |
| 4         | 2-Nonanone      | 0       | 1.779 <sup>ax</sup> B | 154 <sup>1ax</sup> C   | 2.117 <sup>ax</sup> A  | 1.663 <sup>ax</sup> BC | 145 <sup>1ax</sup> C   | 169 <sup>1ax</sup> BC | 0.8 <sup>12</sup> axD  | 0.309 <sup>b</sup> B   | 0.2 <sup>13</sup> bxC  | 0.138 <sup>b</sup> E    | 0.62 <sup>1ax</sup> A  | 0.25 <sup>1ax</sup> BC | 0.17 <sup>b</sup> xDE  | 0.228 <sup>b</sup> CD  |
|           |                 | 7       | 0.369 <sup>ay</sup> C | 0.8 <sup>18</sup> ayB  | 1.477 <sup>ay</sup> A  | 0.189 <sup>ay</sup> D  | 1.233 <sup>ax</sup> A  | 1.364 <sup>ay</sup> A | 0.228 <sup>ay</sup> C  | 0.085 <sup>b</sup> A   | 0.047 <sup>b</sup> CDE | 0.06 <sup>13</sup> byC  | 0.074 <sup>b</sup> AB  | 0.04 <sup>b</sup> DE   | 0.053 <sup>b</sup> CD  | 0.033 <sup>b</sup> E   |
| Aldehydes |                 |         |                       |                        |                        |                        |                        |                       |                        |                        |                        |                         |                        |                        |                        |                        |
| 5         | nonanal, 2-meth | 0       | 0.12 <sup>1y</sup> F  | 0.586 <sup>ay</sup> B  | 0.7 <sup>15</sup> ayA  | 0.323 <sup>b</sup> C   | 0.208 <sup>b</sup> E   | 0.275 <sup>b</sup> D  | 0.238 <sup>ax</sup> DE | 0.249 <sup>ay</sup> E  | 0.323 <sup>b</sup> D   | 0.403 <sup>b</sup> C    | 0.5 <sup>12a</sup> B   | 0.546 <sup>ax</sup> B  | 0.699 <sup>ax</sup> A  | 0.204 <sup>y</sup> E   |
|           |                 | 7       | 0.243 <sup>b</sup> F  | 0.769 <sup>ax</sup> B  | 1.127 <sup>ax</sup> A  | 0.642 <sup>ax</sup> C  | 0.409 <sup>b</sup> DE  | 0.377 <sup>b</sup> DE | 0.484 <sup>b</sup> D   | 0.53 <sup>1ax</sup> D  | 0.622 <sup>b</sup> C   | 0.779 <sup>b</sup> AB   | 0.387 <sup>b</sup> F   | 0.442 <sup>ax</sup> E  | 0.73 <sup>1ab</sup> B  | 0.555 <sup>ax</sup> D  |
| 6         | utanal, 3-methy | 0       | 0.243 <sup>b</sup> F  | 1.054 <sup>ax</sup> A  | 0.956 <sup>b</sup> B   | 0.649 <sup>b</sup> BC  | 0.302 <sup>b</sup> EF  | 0.354 <sup>ax</sup> E | 0.486 <sup>b</sup> D   | 1.429 <sup>ay</sup> E  | 2.269 <sup>ax</sup> B  | 2.035 <sup>ax</sup> C   | 2.602 <sup>ax</sup> A  | 1.966 <sup>ax</sup> C  | 1.78 <sup>ax</sup> D   | 1.003 <sup>ay</sup> F  |
|           |                 | 7       | 0.99 <sup>b</sup> BC  | 1.426 <sup>B</sup>     | 1.99 <sup>1ax</sup> A  | 0.16 <sup>13</sup> byE | 0.779 <sup>b</sup> CD  | 0.805 <sup>b</sup> CD | 0.6 <sup>17</sup> bD   | 1.977 <sup>ax</sup> B  | 1.368 <sup>y</sup> C   | 1.849 <sup>B</sup>      | 1.4 <sup>14</sup> ayC  | 1.548 <sup>ay</sup> C  | 1.55 <sup>1ay</sup> C  | 2.24 <sup>ax</sup> A   |
| 7         | utanal, 2-methy | 0       | 0.28 <sup>1y</sup> F  | 1.254 <sup>ax</sup> B  | 1.4 <sup>12</sup> ayA  | 0.948 <sup>ay</sup> C  | 0.374 <sup>b</sup> E   | 0.357 <sup>b</sup> EF | 0.5 <sup>14</sup> ayD  | 0.46 <sup>ay</sup> BC  | 0.18 <sup>b</sup> DE   | 0.47 <sup>13</sup> byC  | 0.359 <sup>b</sup> D   | 0.564 <sup>ax</sup> A  | 0.485 <sup>ay</sup> B  | 0.436 <sup>b</sup> BC  |
|           |                 | 7       | 1.535 <sup>ax</sup> B | 1.554 <sup>B</sup>     | 2.52 <sup>1ax</sup> A  | 0.18 <sup>1x</sup> D   | 0.9 <sup>14</sup> axC  | 0.86 <sup>1ax</sup> C | 0.805 <sup>ax</sup> C  | 0.935 <sup>b</sup> BC  | 1.274 <sup>ax</sup> A  | 0.843 <sup>b</sup> BC   | 0.189 <sup>y</sup> D   | 0.149 <sup>b</sup> D   | 0.563 <sup>b</sup> BC  | 0.404 <sup>b</sup> C   |
| 8         | Hexanal         | 0       | 0.16 <sup>3</sup> BC  | 0.43 <sup>1y</sup> A   | 0.199 <sup>b</sup> C   | 0.184 <sup>b</sup> C   | 0.13 <sup>1y</sup> D   | 0.174 <sup>b</sup> C  | 0.245 <sup>y</sup> B   | 0.544 <sup>ay</sup> B  | 0.39 <sup>b</sup> C    | 0.7 <sup>17</sup> ayA   | 0.57 <sup>ax</sup> B   | 0.37 <sup>1ay</sup> C  | 0.41 <sup>1ay</sup> C  | 0.274 <sup>y</sup> D   |
|           |                 | 7       | 0.190 <sup>b</sup> D  | 2.6 <sup>18</sup> axA  | 1.24 <sup>b</sup> BC   | 0.283 <sup>b</sup> CD  | 0.5 <sup>14</sup> axC  | 0.4 <sup>13</sup> axC | 0.463 <sup>b</sup> CD  | 2.298 <sup>ax</sup> B  | 2.364 <sup>ax</sup> B  | 1.7 <sup>11</sup> axC   | 0.595 <sup>ax</sup> F  | 2.958 <sup>ax</sup> A  | 1.143 <sup>ax</sup> E  | 1.274 <sup>ax</sup> D  |
| 9         | Heptanal        | 0       | 0.544 <sup>A</sup>    | 0.407 <sup>ax</sup> B  | 0.347 <sup>b</sup> BC  | 0.402 <sup>b</sup> BC  | 0.268 <sup>b</sup> D   | 0.366 <sup>b</sup> BC | 0.173 <sup>b</sup> E   | 0.583 <sup>y</sup> B   | 0.38 <sup>ay</sup> D   | 0.726 <sup>ay</sup> A   | 0.5 <sup>1ay</sup> C   | 0.537 <sup>ay</sup> BC | 0.565 <sup>ay</sup> BC | 0.368 <sup>ay</sup> D  |
|           |                 | 7       | 0.542 <sup>ax</sup> A | 0.393 <sup>b</sup> BC  | 0.29 <sup>1y</sup> D   | 0.582 <sup>ay</sup> A  | 0.404 <sup>ax</sup> B  | 0.357 <sup>b</sup> C  | 0.175 <sup>b</sup> E   | 2.683 <sup>ax</sup> AB | 2.985 <sup>ax</sup> A  | 2.237 <sup>ax</sup> ABC | 0.558 <sup>ax</sup> D  | 1.734 <sup>ax</sup> BC | 1.30 <sup>1ax</sup> CD | 1.18 <sup>ax</sup> CD  |
| 10        | Benzaldehyde    | 0       | 1.582 <sup>ay</sup> D | 3.058 <sup>ax</sup> A  | 2.622 <sup>ay</sup> B  | 2.936 <sup>ax</sup> A  | 1.209 <sup>ay</sup> E  | 1.46 <sup>ay</sup> D  | 1.874 <sup>ay</sup> C  | 0.162 <sup>b</sup> C   | 0.854 <sup>b</sup> A   | 0.926 <sup>b</sup> AB   | 0.268 <sup>b</sup> BC  | 0.16 <sup>b</sup> DE   | 0.172 <sup>b</sup> C   | 0.109 <sup>b</sup> C   |
|           |                 | 7       | 2.3 <sup>1ax</sup> C  | 1.993 <sup>b</sup> D   | 3.246 <sup>ax</sup> A  | 3.206 <sup>ax</sup> A  | 1.882 <sup>ax</sup> D  | 2.2 <sup>18</sup> axC | 2.9 <sup>1ax</sup> BC  | 0.143 <sup>b</sup> E   | 4.407 <sup>ax</sup> A  | 0.507 <sup>b</sup> D    | 0.12 <sup>1y</sup> DE  | 1.988 <sup>ax</sup> B  | 0.25 <sup>1ax</sup> E  | 1.328 <sup>b</sup> BC  |
| 11        | Nonanal         | 0       | 1.04 <sup>ay</sup> AB | 1.129 <sup>ax</sup> AB | 0.959 <sup>ay</sup> BC | 0.82 <sup>ay</sup> D   | 0.756 <sup>ay</sup> CD | 1.195 <sup>ax</sup> A | 1.067 <sup>ax</sup> AB | 0.304 <sup>b</sup> BC  | 0.272 <sup>b</sup> BC  | 0.224 <sup>b</sup> D    | 0.665 <sup>ax</sup> A  | 0.263 <sup>b</sup> C   | 0.298 <sup>b</sup> BC  | 0.238 <sup>b</sup> CD  |
|           |                 | 7       | 2.36 <sup>ax</sup> A  | 1.242 <sup>ax</sup> B  | 1.069 <sup>ax</sup> C  | 1.237 <sup>ax</sup> B  | 1.18 <sup>ax</sup> BC  | 1.057 <sup>ax</sup> C | 1.326 <sup>ax</sup> B  | 0.17 <sup>1y</sup> DE  | 0.239 <sup>b</sup> CD  | 0.238 <sup>b</sup> CD   | 0.265 <sup>b</sup> C   | 0.367 <sup>b</sup> BC  | 0.417 <sup>ax</sup> A  | 0.225 <sup>b</sup> D   |
| Furans    |                 |         |                       |                        |                        |                        |                        |                       |                        |                        |                        |                         |                        |                        |                        |                        |
| 12        | 2-Ethylfuran    | 0       | 0.049 <sup>b</sup> DE | 0.085 <sup>b</sup> D   | 0.157 <sup>b</sup> C   | 0.262 <sup>b</sup> A   | 0.254 <sup>ax</sup> A  | 0.13 <sup>1y</sup> C  | 0.193 <sup>b</sup> B   | 1.433 <sup>ay</sup> BC | 1.286 <sup>ay</sup> C  | 1.565 <sup>ay</sup> B   | 1.979 <sup>ax</sup> A  | 1.375 <sup>ax</sup> C  | 1.587 <sup>ay</sup> B  | 0.8 <sup>18</sup> ayD  |
|           |                 | 7       | 0.127 <sup>b</sup> BC | 0.187 <sup>b</sup> B   | 0.217 <sup>b</sup> BC  | 0.359 <sup>b</sup> AB  | 0.147 <sup>b</sup> C   | 0.188 <sup>b</sup> C  | 0.208 <sup>b</sup> B   | 2.2 <sup>15</sup> axB  | 3.056 <sup>ax</sup> A  | 2.294 <sup>ax</sup> B   | 1.095 <sup>ay</sup> E  | 1.188 <sup>ax</sup> E  | 1.817 <sup>ax</sup> C  | 1.439 <sup>ax</sup> D  |
| 13        | 2-Vinylfuran    | 0       | 0.392 <sup>b</sup> BC | 0.372 <sup>b</sup> BC  | 4.082 <sup>ax</sup> A  | 0.467 <sup>b</sup> BC  | 0.538 <sup>b</sup> BC  | 0.226 <sup>b</sup> C  | 0.532 <sup>b</sup> BC  | 0.92 <sup>ax</sup> B   | 0.638 <sup>ay</sup> D  | 0.629 <sup>b</sup> D    | 1.893 <sup>ax</sup> A  | 0.696 <sup>ay</sup> CD | 0.8 <sup>18</sup> ayBC | 0.678 <sup>ay</sup> CD |
|           |                 | 7       | 2.289 <sup>ax</sup> C | 2.854 <sup>ax</sup> B  | 4.103 <sup>ax</sup> A  | 2.537 <sup>ax</sup> BC | 1.086 <sup>ax</sup> D  | 0.494 <sup>ax</sup> E | 0.863 <sup>ax</sup> DE | 1.012 <sup>b</sup> BC  | 1.105 <sup>ax</sup> A  | 0.829 <sup>b</sup> DE   | 0.89 <sup>b</sup> DE   | 1.075 <sup>ax</sup> AB | 1.062 <sup>ax</sup> AB | 0.94 <sup>ax</sup> CD  |
| 14        | 2-Pentylfuran   | 0       | 0.5 <sup>1ay</sup> D  | 0.905 <sup>ax</sup> AB | 0.845 <sup>ax</sup> B  | 0.925 <sup>ax</sup> A  | 0.463 <sup>ay</sup> D  | 0.609 <sup>ay</sup> C | 0.469 <sup>ay</sup> D  | 0.239 <sup>b</sup> C   | 0.347 <sup>b</sup> BC  | 0.50 <sup>1ax</sup> A   | 0.2 <sup>18</sup> axCD | 0.209 <sup>b</sup> D   | 0.18 <sup>b</sup> DE   | 0.197 <sup>b</sup> D   |
|           |                 | 7       | 0.946 <sup>ax</sup> A | 0.65 <sup>1ay</sup> D  | 0.86 <sup>ax</sup> B   | 0.34 <sup>1ay</sup> E  | 0.738 <sup>ax</sup> C  | 0.726 <sup>ax</sup> C | 0.7 <sup>12</sup> axCD | 0.286 <sup>b</sup> C   | 0.164 <sup>b</sup> DE  | 0.209 <sup>b</sup> D    | 0.133 <sup>b</sup> DE  | 0.48 <sup>1ax</sup> A  | 0.202 <sup>b</sup> D   | 0.343 <sup>b</sup> BC  |

| No                            | Volatiles            | Storage | Control                |                        |                        |                       |                        |                        |                       | PEF                    |                        |                        |                        |                        |                        |                        |
|-------------------------------|----------------------|---------|------------------------|------------------------|------------------------|-----------------------|------------------------|------------------------|-----------------------|------------------------|------------------------|------------------------|------------------------|------------------------|------------------------|------------------------|
|                               |                      |         | Knuckle                | Loin                   | Rump                   | Rib                   | Shank                  | Shoulder               | Topside               | Knuckle                | Loin                   | Rump                   | Rib                    | Shank                  | Shoulder               | Topside                |
| Nitrogen and sulfur compounds |                      |         |                        |                        |                        |                       |                        |                        |                       |                        |                        |                        |                        |                        |                        |                        |
| 15                            | Pyridine             | 0       | 0.023 <sup>b</sup> D   | 0.00 <sup>1y</sup> D   | 0.107 <sup>b</sup> C   | 0.264 <sup>b</sup> B  | 0.383 <sup>b</sup> AB  | 0.135 <sup>b</sup> C   | 0.269 <sup>b</sup> B  | 2.764 <sup>ay</sup> B  | 3.18 <sup>ay</sup> A   | 2.455 <sup>ay</sup> C  | 3.428 <sup>ax</sup> A  | 3.225 <sup>ay</sup> A  | 3.202 <sup>ay</sup> A  | 3.35 <sup>1ay</sup> A  |
|                               |                      | 7       | 0.382 <sup>b</sup> C   | 0.009 <sup>b</sup> E   | 0.14 <sup>1x</sup> D   | 0.027 <sup>b</sup> E  | 0.402 <sup>b</sup> BC  | 1.449 <sup>b</sup> BC  | 1.544 <sup>ax</sup> A | 4.185 <sup>ax</sup> BC | 4.472 <sup>ax</sup> A  | 4.1 <sup>1ax</sup> C   | 3.82 <sup>1ax</sup> D  | 4.386 <sup>ax</sup> AB | 4.094 <sup>ax</sup> C  | 4.052 <sup>ax</sup> CD |
| 16                            | Pyrrole              | 0       | 0.593 <sup>ay</sup> A  | 0.309 <sup>ay</sup> C  | 0.257 <sup>ay</sup> D  | 0.252 <sup>b</sup> D  | 0.24 <sup>1y</sup> D   | 0.248 <sup>ay</sup> D  | 0.365 <sup>ay</sup> B | 0.349 <sup>b</sup> BC  | 0.155 <sup>b</sup> DE  | 0.217 <sup>ax</sup> D  | 0.775 <sup>ax</sup> A  | 0.433 <sup>ax</sup> B  | 0.155 <sup>b</sup> DE  | 0.147 <sup>b</sup> E   |
|                               |                      | 7       | 3.664 <sup>ax</sup> CD | 8.259 <sup>ax</sup> A  | 3.388 <sup>ax</sup> D  | 7.0 <sup>18</sup> axB | 3.733 <sup>ax</sup> C  | 2.6 <sup>12</sup> axE  | 3.3 <sup>14</sup> axD | 0.04 <sup>b</sup> A    | 0.025 <sup>b</sup> BC  | 0.039 <sup>b</sup> A   | 0.029 <sup>b</sup> ABC | 0.04 <sup>1y</sup> A   | 0.036 <sup>b</sup> AB  | 0.022 <sup>b</sup> BC  |
| 17                            | Pyrazine, methyl     | 0       | 0.022 <sup>b</sup> DE  | 0.237 <sup>b</sup> BC  | 0.167 <sup>b</sup> D   | 0.339 <sup>b</sup> AB | 0.273 <sup>b</sup> B   | 0.227 <sup>b</sup> C   | 0.18 <sup>b</sup> D   | 0.796 <sup>ay</sup> C  | 1.082 <sup>ay</sup> B  | 0.895 <sup>ay</sup> C  | 0.623 <sup>ay</sup> D  | 1.39 <sup>ay</sup> A   | 0.323 <sup>ay</sup> E  | 0.37 <sup>ay</sup> E   |
|                               |                      | 7       | 1.054 <sup>b</sup> F   | 2.254 <sup>b</sup> BC  | 2.66 <sup>1ax</sup> B  | 1.107 <sup>b</sup> EF | 3.14 <sup>1ax</sup> A  | 137 <sup>1ax</sup> D   | 1.286 <sup>b</sup> DE | 1.69 <sup>1ax</sup> C  | 2.637 <sup>ax</sup> B  | 4.295 <sup>ax</sup> A  | 14 <sup>1ax</sup> C    | 4.572 <sup>ax</sup> A  | 1.545 <sup>ax</sup> C  | 1.542 <sup>ax</sup> C  |
| 18                            | zine, 2-ethyl-3-m    | 0       | 0.656 <sup>b</sup> B   | 0.10 <sup>1y</sup> DE  | 0.653 <sup>b</sup> B   | 0.546 <sup>y</sup> C  | 0.202 <sup>b</sup> D   | 0.92 <sup>b</sup> A    | 0.496 <sup>b</sup> C  | 2.47 <sup>1ay</sup> B  | 3.73 <sup>1ay</sup> A  | 2.353 <sup>ay</sup> B  | 0.557 <sup>y</sup> E   | 1.004 <sup>ay</sup> D  | 1.375 <sup>ay</sup> C  | 0.6 <sup>14</sup> ayE  |
|                               |                      | 7       | 8.326 <sup>b</sup> C   | 7.2 <sup>12</sup> axD  | 9.197 <sup>b</sup> BC  | 9.736 <sup>b</sup> AB | 1.328 <sup>b</sup> E   | 1.546 <sup>b</sup> E   | 8.49 <sup>b</sup> BC  | 1.159 <sup>1ax</sup> C | 7.177 <sup>ax</sup> D  | 12.735 <sup>ax</sup> B | 13.67 <sup>ax</sup> A  | 6.398 <sup>ax</sup> E  | 6.60 <sup>1ax</sup> DE | 1.197 <sup>1ax</sup> C |
| 19                            | ne, 3-ethyl-2,5-di   | 0       | 2.749 <sup>b</sup> B   | 0.982 <sup>b</sup> D   | 2.837 <sup>b</sup> B   | 1.95 <sup>b</sup> C   | 1.062 <sup>b</sup> D   | 3.334 <sup>b</sup> A   | 1.883 <sup>y</sup> C  | 9.568 <sup>ay</sup> B  | 16.503 <sup>ax</sup> A | 8.643 <sup>ay</sup> B  | 5.827 <sup>ay</sup> C  | 4.993 <sup>ay</sup> CD | 4.484 <sup>ay</sup> D  | 1.778 <sup>y</sup> E   |
|                               |                      | 7       | 9.89 <sup>b</sup> BC   | 10.185 <sup>b</sup> BC | 17.53 <sup>b</sup> axA | 2.586 <sup>b</sup> DE | 5.395 <sup>b</sup> CD  | 5.617 <sup>b</sup> CD  | 8.504 <sup>b</sup> BC | 22.00 <sup>1ax</sup> B | 16.752 <sup>ax</sup> D | 24.907 <sup>ax</sup> A | 24.3 <sup>18</sup> axA | 19.625 <sup>ax</sup> C | 19.877 <sup>ax</sup> C | 14.7 <sup>12</sup> axE |
| 20                            | ne, 3,5-diethyl-2-yl | 0       | 2.288 <sup>b</sup> B   | 1.298 <sup>b</sup> D   | 1.984 <sup>b</sup> C   | 3.028 <sup>b</sup> A  | 0.548 <sup>b</sup> F   | 0.369 <sup>b</sup> G   | 1.00 <sup>1y</sup> E  | 9.247 <sup>ay</sup> C  | 1.998 <sup>ay</sup> E  | 8.57 <sup>ay</sup> C   | 6.397 <sup>ax</sup> D  | 22.388 <sup>ax</sup> A | 17.145 <sup>ax</sup> B | 6.337 <sup>ax</sup> D  |
|                               |                      | 7       | 2.776 <sup>b</sup> BC  | 1.322 <sup>b</sup> D   | 3.54 <sup>ax</sup> A   | 3.066 <sup>b</sup> B  | 1.797 <sup>ax</sup> C  | 1.82 <sup>1ax</sup> C  | 2.005 <sup>b</sup> BC | 30.345 <sup>ax</sup> A | 27.654 <sup>ax</sup> A | 24.56 <sup>1ax</sup> B | 6.93 <sup>1ax</sup> D  | 1873 <sup>ay</sup> E   | 17.503 <sup>ax</sup> C | 3.947 <sup>ay</sup> E  |
| 21                            | Thiophene            | 0       | 1.794 <sup>ay</sup> BC | 1.645 <sup>ay</sup> CD | 2.163 <sup>ay</sup> A  | 1.895 <sup>ay</sup> B | 1.564 <sup>ay</sup> DE | 1.404 <sup>ay</sup> E  | 2.109 <sup>ay</sup> A | 0.81 <sup>b</sup> yD   | 0.463 <sup>b</sup> F   | 1.046 <sup>b</sup> C   | 0.645 <sup>b</sup> DE  | 1.647 <sup>ax</sup> A  | 1.289 <sup>b</sup> B   | 0.718 <sup>b</sup> yDE |
|                               |                      | 7       | 2.86 <sup>ax</sup> A   | 2.6 <sup>1ax</sup> B   | 2.996 <sup>ax</sup> A  | 2.994 <sup>ax</sup> A | 2.293 <sup>ax</sup> C  | 2.22 <sup>ax</sup> C   | 2.6 <sup>18</sup> axB | 2.674 <sup>ax</sup> B  | 2.842 <sup>ax</sup> A  | 2.696 <sup>b</sup> BC  | 0.97 <sup>b</sup> xD   | 0.762 <sup>b</sup> DE  | 1.825 <sup>b</sup> BC  | 1.00 <sup>1ax</sup> D  |
| 22                            | Dimethyl disulfid    | 0       | 0.56 <sup>ax</sup> A   | 0.512 <sup>b</sup> BCD | 0.498 <sup>b</sup> CD  | 0.556 <sup>b</sup> AB | 0.544 <sup>b</sup> AB  | 0.518 <sup>b</sup> ABC | 0.47 <sup>1y</sup> D  | 2.177 <sup>ay</sup> B  | 1.597 <sup>ay</sup> D  | 1.897 <sup>ay</sup> C  | 2.547 <sup>ax</sup> A  | 1.767 <sup>ay</sup> C  | 1.795 <sup>ay</sup> C  | 1.859 <sup>ay</sup> C  |
|                               |                      | 7       | 0.649 <sup>b</sup> AB  | 0.61 <sup>1ax</sup> B  | 0.637 <sup>b</sup>     |                       |                        |                        |                       |                        |                        |                        |                        |                        |                        |                        |

**Supplementary Table S3.** The volatile composition of frozen-thawed lamb with and without PEF treatments (mg/100 g dry meat) during 0 or 7 days of storage

| No                            | Volatiles                              | Storage | Control    |            |             |            |            |            |            | PEF        |            |            |            |            |            |            |
|-------------------------------|----------------------------------------|---------|------------|------------|-------------|------------|------------|------------|------------|------------|------------|------------|------------|------------|------------|------------|
|                               |                                        |         | Knuckle    | Loin       | Rump        | Rib        | Shank      | Shoulder   | Topside    | Knuckle    | Loin       | Rump       | Rib        | Shank      | Shoulder   | Topside    |
| Alcohols                      |                                        |         |            |            |             |            |            |            |            |            |            |            |            |            |            |            |
| 1                             | 1-Hexanol                              | 0       | 0.925yA    | 0.714yB C  | 0.948ayA    | 0.826yAB   | 0.61yC     | 0.6yC      | 0.83ayAB   | 1453A      | 0.509byC   | 0.702byB C | 0.976yB    | 0.657ayC   | 0.663C     | 0.529byC   |
|                               |                                        | 7       | 1.249xB    | 1.914xA    | 1.443xB     | 1.225bxB   | 1.364xB    | 1.366axB   | 1.42xB     | 1.386AB    | 0.755bxC   | 1.508xA    | 1.393axAB  | 1.309xB    | 0.707bC    | 1.417xAB   |
| Ketones                       |                                        |         |            |            |             |            |            |            |            |            |            |            |            |            |            |            |
| 2                             | 1,3-Octanedione                        | 0       | 2.37byB    | 0.844xC    | 0.952byC    | 3.022ayA   | 3.182ayA   | 0.939ayC   | 0.237byD   | 5.072aA    | 0.674byE   | 1.562ayB C | 1.815byB   | 1.209byCD  | 0.951ayDE  | 0.801ayDE  |
|                               |                                        | 7       | 3.464bxB C | 0.263byE   | 3.153bxC    | 4.165bxAB  | 5.022xA    | 2.059bxD   | 5.169axA   | 4.704aC    | 2.959axE   | 6.177axB   | 1.805axA   | 4.71xC     | 3.484axDE  | 4.479bxC D |
| 3                             | 2-Heptanone                            | 0       | 0.165byD   | 0.22yD     | 1.072ayA    | 0.225byD   | 0.835aB    | 0.424yC    | 0.464ayC   | 1.708ayA   | 0.267yC    | 0.576byB   | 0.569ayB   | 0.486byB C | 0.413yB C  | 0.299byC   |
|                               |                                        | 7       | 1.031bxB C | 1.17xB     | 1.538bxA    | 0.499bxE   | 0.773bD    | 0.541bxE   | 0.971bxC   | 3.588axB C | 1.072xE    | 5.027axA   | 3.971axAB  | 2.481axCD  | 1.548axDE  | 3.198axB C |
| 4                             | 2-Nonanone                             | 0       | 1.257axC   | 0.706ayD   | 2.838aA     | 0.519ayD   | 1.952axB   | 1.144aC    | 0.623ayD   | 0.061b     | 0.068bX    | 0.066by    | 0.082by    | 0.066by    | 0.082by    | 0.073b     |
|                               |                                        | 7       | 0.955ayDE  | 3.614axA   | 2.484aB     | 0.729axE   | 1.359ayC   | 1.127aCD   | 1.004axDE  | 0.188aB    | 0.047byD   | 0.184bxB C | 0.258bxB   | 0.117bxB C | 0.198bxB   | 0.098bC    |
| Aldehydes                     |                                        |         |            |            |             |            |            |            |            |            |            |            |            |            |            |            |
| 5                             | 4-oxoheptanal, 2-meth                  | 0       | 2.542axA   | 0.314ayC   | 0.814yB     | 0.52yB C   | 0.327yC    | 0.263yC    | 0.221yC    | 1.091byA   | 0.23byC    | 0.457byB   | 0.441yB    | 0.443yB    | 0.318yB C  | 0.209yC    |
|                               |                                        | 7       | 3.031axB   | 4.478axA   | 2.959xB     | 5.194xA    | 1.885xC    | 1.902axC   | 2.806axB   | 1.249byA   | 0.818bxC   | 4.387xA    | 4.094xA    | 2.594xB    | 1.575bxB C | 0.727bxB C |
| 6                             | 4-oxohexanal, 3-methy                  | 0       | 0.585byD   | 0.675yCD   | 1.005byA    | 0.31byE    | 0.836byB   | 0.746B C   | 0.763byB C | 2.005ayB   | 0.76yD     | 2.097ayB   | 1.182ayC   | 1.207ayC   | 0.911yCD   | 5.442ayA   |
|                               |                                        | 7       | 6.501xB    | 9.136axA   | 6.744xB     | 6.89xB     | 4.021xC    | 4.344aC    | 9.511axA   | 5.062axB C | 1.931bxD   | 6.796axB   | 7.028xA    | 5.333axB C | 3.637bxC D | 4.567bxB C |
| 7                             | 4-oxopentanal, 2-methy                 | 0       | 0.448byDE  | 0.818ayC   | 2.135ayB    | 0.191ayE   | 0.759ayCD  | 0.722aCD   | 6.737ayA   | 0.768ayA   | 0.114byD   | 0.738byA   | 0.292ayB C | 0.228byCD  | 0.384byB   | 0.185byCD  |
|                               |                                        | 7       | 8.075axCD  | 1.819axB   | 9.018axC    | 6.725axDE  | 5.02axF    | 5.346axEF  | 13.477axA  | 1.787bxB   | 0.769bxC   | 2.073bxA   | 1.379bxB   | 0.605bxC   | 0.668bxC   | 1.452bxB   |
| 8                             | Hexanal                                | 0       | 0.132yD    | 0.168yD    | 0.441byA    | 0.149yD    | 0.303bC    | 0.186yD    | 0.374yB    | 2.422ayA   | 0.556ayC   | 1.753ayB   | 0.661ayC   | 0.504ayC   | 0.679ayC   | 0.535yC    |
|                               |                                        | 7       | 0.676bxA   | 0.346bxC   | 0.576bxB    | 0.293bxC   | 0.374bC    | 0.33bxC    | 0.743bxA   | 5.256axA   | 1.969axB   | 5.574axA   | 4.524axA   | 1.598axB   | 1.711axB   | 4.439axA   |
| 9                             | Heptanal                               | 0       | 0.201byC   | 0.187bC    | 0.268bB C   | 0.314byAB  | 0.388xA    | 0.269bB C  | 0.184byC   | 2.433ayA   | 0.517ayB C | 2.254ayA   | 0.611ayB C | 0.527yB C  | 0.864ayB   | 0.513ayC   |
|                               |                                        | 7       | 0.336bxB   | 0.271bB C  | 0.336bAB    | 0.205bxC   | 0.279byB C | 0.117bD    | 0.404bxA   | 5.289axAB  | 1.818axC   | 6.169axA   | 4.213axB   | 1.616axC   | 1.895axC   | 4.459axB   |
| 10                            | Benzaldehyde                           | 0       | 0.968yEF   | 1.166yDE   | 3.044ayB    | 0.841ayF   | 1.538ayC   | 1.456ayCD  | 4.131ayA   | 1.282A     | 1.131yA    | 0.438byB C | 0.528byB   | 0.36byCD   | 0.228byD   | 0.314byCD  |
|                               |                                        | 7       | 5.024axB   | 5.844axA   | 4.327axB C  | 4.336bxB C | 3.12axD    | 3.997axCD  | 6.159axA   | 1.135bB    | 1.925bxB   | 1.117bxB   | 1.018axA   | 0.852bxB   | 0.544bxB   | 1.388bxB   |
| 11                            | Nonanal                                | 0       | 0.77yB C   | 0.692ayC   | 0.699ayC    | 0.922ayB   | 1.226aA    | 0.922aB    | 0.728ayB C | 0.691yA    | 0.082byDE  | 0.153byD   | 0.591bB    | 0.41bC     | 0.084byDE  | 0.045byE   |
|                               |                                        | 7       | 3.279axA   | 2.234axB   | 1.96axB C   | 1.734axC   | 1.33aD     | 1.324aD    | 3.631axA   | 0.718bB    | 0.262bxD   | 0.627bxB   | 1.971aA    | 0.407bC    | 0.17bxD    | 0.46bxC    |
| Furans                        |                                        |         |            |            |             |            |            |            |            |            |            |            |            |            |            |            |
| 12                            | 2-Ethylfuran                           | 0       | 3.162xA    | 0.444bxB   | 0.151byB C  | 0.31byB C  | 0.231byB C | 0.286byC   | 0.321byC   | 4.051yA    | 0.835ayB   | 1.836ayB   | 0.833ayC   | 1.203ayCD  | 1.734ayCD  | 0.661ayD   |
|                               |                                        | 7       | 2.383byA   | 0.124yB    | 0.553bxB    | 0.12bxB    | 0.479bxC   | 0.147bxC   | 0.52bxC    | 4.419aA    | 1.82axB    | 4.107axA   | 4.048axA   | 2.428axB   | 2.587axB   | 4.412axA   |
| 13                            | 2-Vinylfuran                           | 0       | 0.526bxD   | 3.993axB   | 0.274byDE   | 2.162axC   | 0.02byE    | 0.697yD    | 4.504ayA   | 1.483aA    | 0.51byEF   | 0.857ayD   | 1.3bB      | 0.981ayC   | 0.568yE    | 0.443byF   |
|                               |                                        | 7       | 0.226byF   | 1.043yE    | 5.778axA    | 0.917byE   | 2.457axD   | 3.037axC   | 5.238axB   | 1.952aB    | 0.951bC    | 2.05bxB    | 4.044aA    | 1.262bxB C | 0.71bxC    | 1.473bxB C |
| 14                            | 2-Pentylfuran                          | 0       | 0.241byD   | 0.282ayD   | 1.133ayA    | 0.277byD   | 0.914aB    | 0.531ayC   | 0.154byD   | 0.08bE     | 0.171bxD   | 0.522bxA   | 0.427ayB C | 0.442bB    | 0.207bD    | 0.365ayC   |
|                               |                                        | 7       | 1.761axAB  | 1.609axB   | 2.029axA    | 0.714axC   | 0.991aC    | 0.848axC   | 1.646axB   | 0.088bD    | 0.084byD   | 0.235byC   | 0.197bxC   | 0.404bA    | 0.206bB C  | 0.29bxD    |
| No                            | Volatiles                              | Storage | Control    |            |             |            |            |            |            | PEF        |            |            |            |            |            |            |
|                               |                                        |         | Knuckle    | Loin       | Rump        | Rib        | Shank      | Shoulder   | Topside    | Knuckle    | Loin       | Rump       | Rib        | Shank      | Shoulder   | Topside    |
| Nitrogen and sulfur compounds |                                        |         |            |            |             |            |            |            |            |            |            |            |            |            |            |            |
| 15                            | Pyridine                               | 0       | 0.032bAB   | 0.037bA    | 0.028byB C  | 0.032byAB  | 0.011byD   | 0.025bC    | 0.032bAB   | 6.116ayA   | 3.482ayDE  | 4.47ayC    | 5.202aB    | 3.724ayD   | 3.86aCD    | 2.966ayE   |
|                               |                                        | 7       | 0.031bC    | 0.03bC     | 0.046bxB    | 0.082bxA   | 0.075bxA   | 0.02bD     | 0.035bC    | 7.21axAB   | 3.852axD   | 8.255axAB  | 9.105aA    | 4.265axCD  | 3.512aD    | 6.087axB C |
| 16                            | Pyrrole                                | 0       | 0.725axA   | 0.232ayD   | 0.409ayB    | 0.418ayB   | 0.374ayB C | 0.306ayCD  | 0.429ayB   | 0.032byB   | 0.021byE   | 0.024byCDE | 0.053byA   | 0.025byCD  | 0.027byC   | 0.023byDE  |
|                               |                                        | 7       | 0.596ayCD  | 0.92axA    | 0.676axC    | 0.517axD   | 0.679axC   | 0.501axD   | 0.807axB   | 0.049bxB   | 0.038bxC   | 0.033bxD E | 0.063bxA   | 0.033bxD   | 0.036bxC D | 0.03bxE    |
| 17                            | 2-Pyrazine, methyl                     | 0       | 0.171yD    | 1.239ayB   | 1.245ayB    | 0.142byD   | 0.685ayC   | 1.197ayB   | 4.538ayA   | 0.367yA    | 0.262byD   | 0.315bB C  | 0.346aAB   | 0.321byABC | 0.286byCD  | 0.169byE   |
|                               |                                        | 7       | 1.076axA   | 8.368axB   | 7.029axB C  | 3.949axE   | 5.139axDE  | 6.653axCD  | 12.099axA  | 0.68bxB    | 0.595bxB   | 0.29bB     | 0.989bA    | 0.47bxB    | 0.593bxB   | 0.731bxB   |
| 18                            | 2,3-Dimethyl-2-butene, 2-ethyl-3-m     | 0       | 2.541ayD   | 4.614ayB C | 4.396ayC    | 1.088ayE   | 3.253ayD   | 5.298aB    | 9.425ayA   | 0.969byB   | 0.52byB C  | 2.138ayA   | 0.19byD    | 0.993bB    | 2.09byA    | 0.41byCD   |
|                               |                                        | 7       | 22.308axA  | 20.521axAB | 17.037axC   | 7.923axD   | 16.642axC  | 4.399aE    | 19.442axB  | 2.487bxA   | 1.03bxB    | 3.135bxA   | 2.649bxA   | 0.711bB    | 1.066bxB   | 2.294bxA   |
| 19                            | 2,3-Dimethyl-2-butene, 3-ethyl-2,5-di  | 0       | 8.165ayCD  | 11.378ayB  | 14.495ayA   | 2.006yE    | 6.804ayD   | 9.796ayB C | 14.277ayA  | 2.247byC   | 1.44byC    | 6.72byA    | 1.877C     | 3.506bB    | 7.166bA    | 1.539byC   |
|                               |                                        | 7       | 32.412axD  | 36.442axC  | 40.596axB   | 8.933xE    | 35.015axCD | 7.524aE    | 45.761axA  | 9.317bxA   | 2.321bxB   | 9.277bxA   | 8.155A     | 2.523bB    | 3.901bxB   | 6.861bxA   |
| 20                            | 2,3-Dimethyl-2-butene, 3,5-diethyl-2-m | 0       | 2.466byB   | 1.179byCD  | 1.36byC     | 3.187byA   | 0.997byD   | 1.287byCD  | 2.354byB   | 10.374A    | 3.234aB    | 11.49aA    | 5.014ayB   | 10.573axA  | 9.35ayA    | 4.881ayB   |
|                               |                                        | 7       | 3.487xC D  | 6.507axA   | 4.388bxB C  | 4.154bxB C | 3.082xD    | 3.91bxB CD | 4.443bxB   | 8.326aCD   | 2.811bE    | 11.799aAB  | 9.778axB C | 2.98yE     | 6.594axD   | 13.446axA  |
| 21                            | Thiophene                              | 0       | 3.198ayAB  | 3.081ayAB  | 2.442ayC    | 3.559aA    | 2.461yC    | 2.72yB C   | 2.466ayB   | 2.145bB    | 1.019byC   | 1.804bB    | 1.149bC    | 1.113bC    | 2.709yA    | 0.933byC   |
|                               |                                        | 7       | 5.149axAB  | 4.899axB C | 5.77axA     | 4.276B     | 5.329axAB  | 4.772axB C | 4.279axC   | 2.107aB    | 1.238bxC   | 2.227aB    | 2.696A     | 1.255bC    | 1.574bxB C | 2.041bxB C |
| 22                            | Dimethyl disulfid                      | 0       | 0.726bB    | 0.596bC    | 0.433byD    | 0.729byB   | 0.803byA   | 0.711byB   | 0.583byC   | 4.65ayA    | 2.412ayE   | 3.338ayC   | 3.985ayB   | 2.963ayCD  | 2.528ayE   | 2.647ayDE  |
|                               |                                        | 7       | 0.7bC      | 0.674bC    | 0.698bxC    | 0.822bxB   | 0.876bxA   | 0.78bxB C  | 0.722bxB C | 5.775axB   | 3.814axC   | 6.12axAB   | 6.956axA   | 3.943axC   | 3.584axC   | 6.053axB   |
| 23                            | Dimethylmethaneth                      | 0       | 2.214ayD   | 9.435ayA   | 10.463ayA   | 2.243ayD   | 7.418ayB   | 4.586aC    | 2.492ayD   | 0.824bA    | 0.72byB    | 0.614byC   | 0.838bA    | 0.717bB    | 0.692byB   | 0.639byC   |
|                               |                                        | 7       | 42.545axAB | 36.899axC  | 39.409axB C | 7.972axD   | 36.192axC  | 4.146aE    | 44.418axA  | 0.861bC    | 0.971bxB   | 0.804bxB C | 1.106bA    | 0.798bC    | 0.825bxB C | 0.901bxB C |
| 24                            | Dimethyl trisulfid                     | 0       | 3.553bAB   | 2.428bB C  | 2.329byB C  | 4.528aA    | 2.06byC    | 2.295bB C  | 2.943aB C  | 11.757aB   | 2.768ayC   | 7.885aB    | 2.069byC   | 9.58aB     | 12.031ayA  | 3.217ayC   |
|                               |                                        | 7       | 2.437bD    | 2.6D       | 3.048bxB CD | 4.321aA    | 3.257bxB C | 2.847bCD   | 3.511bB    | 9.245aB    | 3.533xC    | 10.398aB   | 11.011axAB | 4.34aC     | 8.315axB   | 14.353axA  |

<sup>a,b</sup> means with different letters in row show significant effect of processing in each cut; <sup>x,y</sup> means with different letters in column show significant effect of storage in each cut in same processing; <sup>A,B,C,D,E,F</sup> means with different letters in row show significant effect of cut in each processing using Fisher's least significant difference .

**Supplementary Table S4.** Variable of Importance (VIP) coefficients of chilled samples for different variables

| <b>Fatty acids</b> | <b>VIP coefficient</b> | <b>Amino acids</b> | <b>VIP coefficient</b> | <b>Volatiles</b> | <b>VIP coefficient</b> |
|--------------------|------------------------|--------------------|------------------------|------------------|------------------------|
| 20:2 (n-6)         | 1.672                  | HIS                | 1.256                  | VOC15            | 1.466                  |
| MUFA               | 1.338                  | PRO                | 1.163                  | VOC22            | 1.433                  |
| 18:1 cis-9         | 1.326                  | THR                | 1.153                  | VOC16            | 1.328                  |
| C20:0              | 1.280                  | ILE                | 1.120                  | VOC9             | 1.225                  |
| C14:0              | 1.228                  | TYR                | 1.067                  | VOC17            | 1.170                  |
| C24:0              | 1.193                  | GLY                | 1.033                  | VOC8             | 1.154                  |
| C16:1              | 1.176                  | PHE                | 1.031                  | VOC21            | 1.132                  |
| PUFA               | 1.064                  | GLU                | 1.000                  | VOC7             | 1.106                  |
| n-6                | 1.015                  | ASP                | 0.990                  | VOC14            | 1.090                  |
| SFA                | 0.983                  | MET                | 0.984                  | VOC24            | 1.063                  |
| n-3                | 0.982                  | VAL                | 0.961                  | VOC12            | 1.044                  |
| 18:2 (n-6)         | 0.960                  | ALA                | 0.928                  | VOC18            | 1.043                  |
| 20:1 (n-9)         | 0.954                  | LEU                | 0.881                  | VOC11            | 1.016                  |
| 18:3 (n-3)         | 0.898                  | TRP                | 0.867                  | VOC20            | 0.994                  |
| 20:3 (n-6)         | 0.862                  | LYS                | 0.819                  | VOC4             | 0.942                  |
| C18:0              | 0.835                  | SER                | 0.818                  | VOC23            | 0.886                  |
| 20:5 (n-3)         | 0.728                  | ORN                | 0.787                  | VOC19            | 0.872                  |
| C21:0              | 0.713                  |                    |                        | VOC3             | 0.767                  |
| C17:0              | 0.701                  |                    |                        | VOC10            | 0.718                  |
| P:S                | 0.633                  |                    |                        | VOC13            | 0.683                  |
| C22:0              | 0.593                  |                    |                        | VOC2             | 0.576                  |
| C16:0              | 0.495                  |                    |                        | VOC5             | 0.554                  |
| n-6/n-3            | 0.010                  |                    |                        | VOC1             | 0.323                  |
|                    |                        |                    |                        | VOC6             | 0.255                  |

**Supplementary Table S5.** Variable of Importance (VIP) coefficients of chilled samples for fatty acids, amino acids, volatiles together with sensory

| Variable   | VIP coefficient |
|------------|-----------------|
| VOC22      | 2.148           |
| VOC15      | 2.138           |
| VOC9       | 1.900           |
| VOC8       | 1.869           |
| VOC12      | 1.654           |
| VOC16      | 1.651           |
| HIS        | 1.607           |
| VOC24      | 1.493           |
| VOC3       | 1.458           |
| PRO        | 1.393           |
| VOC20      | 1.356           |
| VOC2       | 1.353           |
| VOC21      | 1.330           |
| GLY        | 1.317           |
| VOC17      | 1.244           |
| VOC14      | 1.230           |
| GLU        | 1.220           |
| TRP        | 1.213           |
| VOC4       | 1.206           |
| ILE        | 1.166           |
| TYR        | 1.165           |
| VOC7       | 1.140           |
| THR        | 1.129           |
| MET        | 1.098           |
| VOC18      | 1.082           |
| PHE        | 1.057           |
| ASP        | 1.001           |
| VOC11      | 0.970           |
| 20:1 (n-9) | 0.935           |
| VOC23      | 0.851           |
| ALA        | 0.835           |
| VAL        | 0.831           |
| VOC19      | 0.804           |
| ORN        | 0.758           |
| LEU        | 0.749           |
| C20:0      | 0.705           |
| SER        | 0.693           |
| VOC13      | 0.611           |
| LYS        | 0.594           |
| C14:0      | 0.532           |
| VOC10      | 0.435           |

|            |       |
|------------|-------|
| C24:0      | 0.349 |
| C22:0      | 0.330 |
| VOC5       | 0.323 |
| C16:1      | 0.312 |
| n-3        | 0.307 |
| C17:0      | 0.305 |
| 20:3 (n-6) | 0.273 |
| 20:5 (n-3) | 0.270 |

---

**Supplementary Table S6.** Variable of Importance (VIP) coefficients of frozen samples for different variables

| <b>Fatty acids</b> | <b>VIP coefficient</b> | <b>Amino acids</b> | <b>VIP coefficient</b> | <b>Volatiles</b> | <b>VIP coefficient</b> |
|--------------------|------------------------|--------------------|------------------------|------------------|------------------------|
| n-3                | 1.378                  | ORN                | 1.239                  | VOC12            | 1.541                  |
| 18:3 (n-3)         | 1.317                  | ASP                | 1.169                  | VOC22            | 1.497                  |
| PUFA               | 1.315                  | SER                | 1.168                  | VOC4             | 1.490                  |
| n-6                | 1.249                  | PHE                | 1.087                  | VOC15            | 1.421                  |
| 18:2 (n-6)         | 1.237                  | HIS                | 1.061                  | VOC19            | 1.270                  |
| 20:3 (n-6)         | 1.234                  | GLY                | 1.042                  | VOC9             | 1.250                  |
| 20:2 (n-6)         | 1.229                  | THR                | 1.033                  | VOC18            | 1.235                  |
| C18:0              | 1.086                  | ILE                | 1.002                  | VOC20            | 1.214                  |
| 20:5 (n-3)         | 1.066                  | LEU                | 0.984                  | VOC14            | 1.186                  |
| SFA                | 1.057                  | VAL                | 0.970                  | VOC3             | 1.096                  |
| 20:1 (n-9)         | 1.049                  | LYS                | 0.943                  | VOC24            | 1.079                  |
| MUFA               | 0.942                  | TRP                | 0.930                  | VOC23            | 1.053                  |
| 18:1 cis-9         | 0.941                  | PRO                | 0.901                  | VOC6             | 1.036                  |
| C22:0              | 0.910                  | GLU                | 0.879                  | VOC17            | 0.882                  |
| C16:0              | 0.867                  | MET                | 0.844                  | VOC8             | 0.807                  |
| C16:1              | 0.862                  | TYR                | 0.829                  | VOC11            | 0.722                  |
| C24:0              | 0.779                  | ALA                | 0.789                  | VOC5             | 0.661                  |
| C14:0              | 0.766                  |                    |                        | VOC1             | 0.519                  |
| C17:0              | 0.764                  |                    |                        | VOC10            | 0.518                  |
| C21:0              | 0.657                  |                    |                        | VOC7             | 0.254                  |
| C20:0              | 0.542                  |                    |                        | VOC21            | 0.099                  |
| P:S                | 0.537                  |                    |                        | VOC16            | 0.080                  |
| n-6/n-3            | 0.318                  |                    |                        | VOC13            | 0.068                  |
|                    |                        |                    |                        | VOC2             | 0.046                  |

**Supplementary Table S7.** Variable of Importance (VIP) coefficients of frozen samples for fatty acids, amino acids, volatiles together with sensory

| Variable   | VIP coefficient |
|------------|-----------------|
| n-3        | 1.529           |
| 18:3 (n-3) | 1.454           |
| PUFA       | 1.442           |
| VOC4       | 1.371           |
| n-6        | 1.361           |
| 20:3 (n-6) | 1.354           |
| 18:2 (n-6) | 1.349           |
| 20:2 (n-6) | 1.333           |
| VOC18      | 1.320           |
| VOC12      | 1.273           |
| VOC22      | 1.267           |
| ORN        | 1.261           |
| C18:0      | 1.231           |
| VOC19      | 1.226           |
| VOC15      | 1.201           |
| 20:5 (n-3) | 1.200           |
| SFA        | 1.195           |
| SER        | 1.190           |
| ASP        | 1.172           |
| VOC9       | 1.125           |
| PHE        | 1.110           |
| 20:1 (n-9) | 1.108           |
| HIS        | 1.062           |
| VOC20      | 1.030           |
| THR        | 1.023           |
| ILE        | 1.017           |
| GLY        | 1.012           |
| MUFA       | 1.006           |
| 18:1 cis-9 | 1.006           |
| LEU        | 0.989           |
| C22:0      | 0.987           |
| VAL        | 0.981           |
| C16:0      | 0.977           |
| VOC24      | 0.948           |
| VOC3       | 0.948           |
| VOC17      | 0.944           |
| VOC14      | 0.941           |
| LYS        | 0.939           |
| TRP        | 0.932           |
| C16:1      | 0.907           |
| PRO        | 0.904           |
| C24:0      | 0.885           |
| C17:0      | 0.879           |
| C14:0      | 0.874           |
| GLU        | 0.870           |
| VOC6       | 0.864           |
| MET        | 0.829           |
| TYR        | 0.820           |
| VOC8       | 0.782           |
| VOC23      | 0.767           |
| ALA        | 0.758           |



|         |       |
|---------|-------|
| VOC5    | 0.733 |
| C21:0   | 0.691 |
| VOC1    | 0.669 |
| C20:0   | 0.608 |
| P:S     | 0.545 |
| VOC11   | 0.463 |
| n-6/n-3 | 0.407 |
| VOC21   | 0.304 |
| VOC10   | 0.291 |
| VOC2    | 0.280 |
| VOC16   | 0.134 |
| VOC7    | 0.108 |
| VOC13   | 0.067 |

---
